# Supplementary material
Source: PubMed Central journal article supplement (PMC5710272)

## Supplementary Online Content

Reddy KP, Kong CY, Hyle EP, et al. Lung Cancer Mortality Associated With Smoking and Smoking Cessation Among People Living With HIV in the United States. *JAMA Intern Med*. Published online September 18, 2017. doi:10.1001/jamainternmed.2017.4349

### **eAppendix.** Methods, Results, and References

**eTable 1.** Validation of Model-Generated Cumulative Lung Cancer Mortality by Age 75 for HIV-Uninfected Current Smokers: Comparison with Case-Control Studies from Western Europe

**eTable 2.** Validation of Model-Generated Cumulative Lung Cancer Mortality by Age 75 for HIV-Uninfected Former and Never Smokers: Comparison with a Case-Control Study from Western Europe

**eTable 3.** Cumulative Mortality by Age 80 from Various Causes for People Entering HIV Care at Age 40, by Smoking Exposure, Assuming Complete Antiretroviral Therapy Adherence and No Loss to Follow-up from HIV Care

**eTable 4.** Cumulative Mortality by Age 80 from Various Causes, by Age at Entry to HIV Care and Smoking Exposure

**eTable 5.** Cumulative Mortality by Age 80 from Various Causes for People Entering HIV Care at Age 40, by Smoking Exposure, Accounting for Incomplete Antiretroviral Therapy Adherence and Loss to Follow-up from HIV Care

**eTable 6.** Cumulative Lung Cancer Mortality by Age 80, by Smoking Exposure: Varying the HIV-Associated Independent Risk of Lung Cancer

**eTable 7.** Effect of Varying the Initial CD4 Cell Count on Model-Projected Cumulative Mortality by Age 80 from Various Causes, by Smoking Status

**eTable 8.** Model-Generated Cumulative Lung Cancer Mortality and Relative Risk Reduction Based on Age at Smoking Cessation, for Those Entering HIV Care at Age 40

**eFigure 1.** Overview of Flow Through CEPAC Monte Carlo Microsimulation Model

**eFigure 2.** Cumulative Mortality by Cause among Male Never Smokers Entering HIV Care at Age 40

This supplementary material has been provided by the authors to give readers additional information about their work.

39 **eAppendix**

40

41 **METHODS: ADDITIONAL INFORMATION**

42

43 *Model Overview*44 Antiretroviral Treatment

45 In the model, all individuals are eligible for immediate antiretroviral therapy (ART) with  
 46 dolutegravir/abacavir/lamivudine, a regimen recommended for initial treatment of HIV. The efficacy of ART (the  
 47 likelihood of viral suppression) is positively correlated with an individual's adherence. People whose virus is  
 48 initially suppressed are subject to a regimen-specific monthly probability of treatment failure after 48 weeks, which  
 49 is inversely correlated with adherence. Treatment failure is detected through quarterly HIV RNA monitoring. Those  
 50 who fail treatment are eligible to receive a subsequent ART regimen. Individuals can be switched to an alternative  
 51 ART regimen if drug toxicity is noted. We assumed complete adherence to ART in the base case but accounted for  
 52 incomplete adherence in sensitivity analysis.

53

54 Loss to Follow-up

55 In the base case, we assumed that all individuals are retained in HIV care (i.e., none are lost to follow-up). In  
 56 sensitivity analysis, we accounted for loss to follow-up from HIV care, wherein individuals discontinue ART. The  
 57 probability of loss to follow-up is inversely correlated with adherence. Following loss to follow-up, individuals have  
 58 a monthly probability of returning to care.

59

60 AIDS-Related Causes of Death

61 In the model, AIDS-related causes of death are those from opportunistic infections or chronic AIDS-related disease.  
 62 Opportunistic infections include *Pneumocystis jiroveci* pneumonia, *Mycobacterium avium* complex infection,  
 63 toxoplasmosis, cytomegalovirus infection, severe fungal infection, and severe bacterial infection. Chronic AIDS-  
 64 related mortality is that related to classic HIV syndromes and disorders, such as chronic wasting, that are not directly  
 65 caused by an opportunistic infection. Input parameters for incidence and mortality from these diseases are derived  
 66 from the literature and are described elsewhere (<http://www.massgeneral.org/mpec/cepac/>).

67

68 *Model Validation*

69 Our first validation strategy was done against case-control studies in Western European general populations. These  
 70 reported cumulative lung cancer mortality by age 75, stratified by smoking exposure, without competing causes of  
 71 death.<sup>1,2</sup> We used our model to predict cumulative lung cancer mortality by age 75, stratified by sex and smoking  
 72 exposure, among 40 year-old HIV-uninfected people. Consistent with the Western European studies, we did not  
 73 account for competing causes of death.

74

75 Our second validation strategy was done against a North American AIDS Cohort Collaboration on Research and  
 76 Design (NA-ACCORD) study, which reported a modeled cumulative lung cancer incidence by age 75 for 20 year-  
 77 old people living with HIV (PLWH) for different calendar periods, the most recent being 2005-2009.<sup>3</sup> The NA-  
 78 ACCORD results were not stratified by sex or by smoking exposure (smoking prevalence was not reported). We  
 79 used our model to predict cumulative lung cancer mortality among 20 year-old PLWH in care in the US, initially  
 80 stratified by sex and smoking status. Because we did not have smoking intensity (cigarettes per day) data specific to  
 81 20 year-old PLWH, we assumed that all smokers consumed a moderate ("average") number of cigarettes per day.  
 82 We accounted for reported rates of non-adherence to ART and loss to follow-up from HIV care, as described in a  
 83 sensitivity analysis in this manuscript. Individuals could die from lung cancer, other non-AIDS-related causes, or  
 84 AIDS-related causes. To facilitate comparison with the NA-ACCORD result, we weighted our model-generated  
 85 results by the prevalence of men and women among PLWH in care in the US – approximately 75% and 25%,  
 86 according to the Centers for Disease Control and Prevention (CDC)<sup>4</sup> – and the prevalence of current, former, and  
 87 never smokers among 20 year-old PLWH in care in the US – 37.6%, 7.3%, and 55.1%, according to the CDC.<sup>5</sup> We  
 88 assumed equal smoking prevalence among men and women with HIV.<sup>5</sup> We assumed no change in smoking status  
 89 over time.

90

91 *Input Parameters*92 Cohort Stratifications by Smoking Exposure

93 We stratified smokers by intensity: heavy, moderate, or light, based on the number of cigarettes consumed per day.  
 94 We assumed that current smokers remained in one of these categories until the end of follow-up (e.g., they did not

95 change from heavy smoking to light smoking). Former smokers were categorized based on smoking intensity prior  
 96 to quitting. Rosenberg et al. previously derived the number of cigarettes consumed per day, stratified by sex, age,  
 97 and five-year birth cohort, based on smoking data for people in the US followed through 2000.<sup>6</sup> Data sources for  
 98 their derivations included the National Health Interview Survey, Substance Abuse and Mental Health Services  
 99 Administration, American Cancer Society Cancer Prevention Studies, and the Berkeley Mortality Database. Within  
 100 each stratum (e.g., 40 year-old women born in 1960-1964), they divided smokers into five quintiles based on the  
 101 number of cigarettes smoked per day. We took the fifth, third, and first quintiles to represent heavy, moderate, and  
 102 light smokers. The third quintile (moderate smokers) approximated the overall median cigarettes per day for each  
 103 sex/age/five-year birth cohort stratum. The number of cigarettes smoked per day changed with age (in accordance  
 104 with the data in Rosenberg et al.<sup>6</sup>), such that the number consumed by a moderate smoker at age 30 was different  
 105 from the number consumed by a moderate smoker at age 50. We applied ages based on age in the year 2000, the last  
 106 year of follow-up. For example, we applied cigarettes per day quantities for 20 year-olds based on data for 20 year-  
 107 olds born in 1980; 21 year-olds were those born in 1979, and so on until reaching 80 year-olds who were those born  
 108 in 1920.

### 109 Lung Cancer Mortality

110 In the model, we applied a monthly probability of dying from lung cancer based on sex, age, and smoking exposure.  
 111 First, we derived annual lung cancer mortality rates in the US general population according to sex, five-year age  
 112 group, and smoking exposure. The data we used in these derivations were: 1) overall lung cancer mortality rates  
 113 stratified by sex and five-year age group (but not by smoking status) from the National Cancer Institute's  
 114 Surveillance, Epidemiology, and End Results Program in 2000;<sup>7</sup> 2) the proportion of current, former, and never  
 115 smokers in the US general population in 2000;<sup>8</sup> and 3) lung cancer mortality risk ratios for current and former  
 116 smokers versus never smokers, further stratified for current smokers by current cigarettes per day (<10, 10-19, 20-  
 117 39, or 40+) and for former smokers by cigarettes per day one year prior to smoking cessation and by age at smoking  
 118 cessation (<40, 40-49, 50-59, or 60-69).<sup>9,10</sup> Because these derived rates were not specific to PLWH, in the base case  
 119 we multiplied the derived rates by 1.7 to account for an independent risk of lung cancer conferred by HIV.<sup>11</sup> We  
 120 converted the annual rates to monthly probabilities for use in our model, using the equation:

$$121 \text{MonthlyProbability} = 1 - \exp(-\text{AnnualRate}/12)$$

### 122 Lung Cancer-Deleted, Non-AIDS-Related Mortality

123 We applied mortality from non-AIDS-related causes other than lung cancer based on published lung cancer-deleted  
 124 life tables, which were stratified by sex, age, birth year, and age at smoking initiation.<sup>6</sup> We assumed that all smokers  
 125 started smoking at age 15. We again applied ages based on age in the year 2000 (e.g., we applied mortality rates for  
 126 40 year-olds based on data for 40 year-olds born in 1960). We assumed, like other studies, that there were no  
 127 smoking-related differences in non-lung cancer mortality prior to age 40.<sup>6,12,13</sup> To account for smoking-related  
 128 differences in mortality from age 40 onward, the data were stratified for never smokers and for the five quintiles of  
 129 current smokers, who had been divided based on average number of cigarettes consumed per day. We again took the  
 130 fifth, third, and first quintiles to represent heavy, moderate, and light smokers.

131 Mortality risks for former smokers, also stratified by sex, age, and birth year, were based on cigarettes per day  
 132 consumed one year prior to quitting, age at quitting, and years since quitting. We applied the following "excess risk"  
 133 multiplicative factor to the difference in mortality rates between current smokers (of the same smoking intensity as  
 134 the former smoker) and never smokers, and the result was then added to the never smoker mortality rate:<sup>6</sup>

$$135 \text{Excess risk factor} = \exp [(-0.1711 + 0.00102 * \text{CPD} + 0.00171 * \text{QuitAge}) * (\text{YearsQuit})^{1.08}]$$

$$136 M_{\text{Former}} = M_{\text{Never}} + (M_{\text{Current}} - M_{\text{Never}}) * \text{Excess risk factor}$$

137 where CPD = cigarettes per day one year prior to quitting, QuitAge = age at smoking cessation, YearsQuit = years  
 138 since smoking cessation,  $M_{\text{Former}}$  = mortality rate for former smokers,  $M_{\text{Never}}$  = mortality rate for never smokers, and  
 139  $M_{\text{Current}}$  = mortality rate for current smokers. We converted all annual rates to monthly probabilities to be applied in  
 140 our model.

151  
152  
153  
154  
155  
156  
157  
158  
159  
160  
161  
162  
163  
164  
165  
166  
167  
168  
169  
170  
171  
172  
173  
174  
175  
176  
177  
178  
179  
180  
181  
182  
183  
184  
185  
186  
187  
188  
189  
190  
191  
192  
193  
194  
195  
196  
197  
198  
199  
200  
201  
202  
203  
204  
205  
206

### *Sensitivity Analysis*

#### Incomplete Adherence to Antiretroviral Therapy and Loss to Follow-Up from HIV Care

In a sensitivity analysis, we accounted for reported rates of non-adherence to ART and loss to follow-up from HIV care. The distribution of ART adherence levels in the modeled cohorts reflects studies of medication possession ratios (MPRs) among PLWH in the US.<sup>14,15</sup> Based on these studies, we applied MPR distributions as follows: 3% of people had MPR <50%, 51% had MPR between 50% and 95%, and 46% had MPR >95%; these values translated to mean MPR 89% and standard deviation 14%.<sup>16</sup> We fit a logit-normal distribution to these data.<sup>16</sup> The model randomly draws a value from this distribution to generate an adherence level for an individual. As described elsewhere,<sup>16</sup> we used published data to derive the relationship between adherence and virologic suppression.<sup>17</sup> Overall, the suppression rate for the entire population matched clinical trial data, with no suppression if an individual's MPR was <5%, and virtually certain suppression if an individual's MPR was >91%.

We derived adherence-specific rates of loss to follow-up to match retention-in-care data from the HIV Research Network.<sup>16,18</sup> Loss to follow-up rates ranged from 0.1 to 84.5/100 person-years, depending on adherence. We assumed that PLWH in the US returned to care at approximately half the rate of those in the Danish HIV Cohort Study.<sup>19</sup> Beginning six months after loss to follow-up, individuals had a 1.5% monthly probability of returning to care which increased to 50% in the month of an acute opportunistic infection.<sup>16</sup>

#### Varying the HIV-Associated Risk Ratio for Lung Cancer

In the base case, we applied an HIV-associated independent risk of lung cancer (versus HIV-uninfected persons) of 1.7, based on the result reported in the largest study to examine the relationship between HIV and lung cancer.<sup>11</sup> In a sensitivity analysis, we varied the HIV-associated risk, examining risk ratios of 1.5 and 1.9 (the lower and upper bounds of the 95% confidence interval reported in the aforementioned study), as well as a risk ratio of 1.0 (i.e., no independent risk of lung cancer conferred by HIV).

#### Varying the Initial CD4 Cell Count at Entry to HIV Care

In the base case, we applied an initial distribution of CD4 count based on NA-ACCORD data, where mean (standard deviation) CD4 count at entry to care was 360/ $\mu$ L (280/ $\mu$ L).<sup>20</sup> In a sensitivity analysis, we changed the initial CD4 count to either 200/ $\mu$ L for all or 500/ $\mu$ L for all (standard deviation of zero). Regardless of initial CD4 count, all subjects were eligible to immediately initiate ART, and we assumed complete adherence to ART.

#### Varying When Former Smokers Quit

In the base case, we assumed that former smokers quit smoking upon entering HIV care. In a sensitivity analysis, we assumed instead that they quit 10 or 20 years after entering HIV care. In these scenarios, they had the same mortality risks as current smokers until they quit, at which point their mortality risks decreased to those of former smokers.

### *Population-Level Impact*

We estimated the total number of expected lung cancer deaths by age 80 among PLWH aged 20-64 in care in the US, and the number of lung cancer deaths that could be averted if a proportion of current smokers were to quit smoking. We have previously described the methodology of determining the number of current, former, and never smokers by sex and age group.<sup>21</sup> In brief, first, we obtained data on the number of new and established diagnoses of HIV infection in the US, stratified by five-year age increment.<sup>4</sup> Next, we multiplied these numbers by the linkage to care rate (77.5%) among those diagnosed with HIV.<sup>22</sup> We then multiplied the number of people linked to care within each five-year age group by the age-specific prevalence of current, former, and never smokers among PLWH, as reported by the CDC,<sup>5</sup> to obtain the number of current, former, and never smokers in each five-year age group. We used the published sex breakdown from the CDC (approximately 75% men and 25% women)<sup>4</sup> and assumed equal smoking prevalence among men and women with HIV. The smoking prevalence data we used for this HIV population-level analysis had been stratified by smoking status but not by intensity, so we assumed that all smokers were moderate ("average") smokers, reflecting the middle quintile of daily cigarette consumption.<sup>5,6</sup> Finally, we multiplied these counts by our model-generated results regarding the cumulative lung cancer mortality by age 80, depending on sex, age, and smoking status, to derive the total expected number of lung cancer deaths if smoking status did not change. We then converted a proportion (20%) of current smokers in each five-year age group to former smokers, to derive the number of lung cancer deaths that could be prevented if this proportion were to stop smoking now.

207 **RESULTS: ADDITIONAL INFORMATION**

208

209 *Model Validation*

210 Our model-generated cumulative lung cancer mortalities for HIV-uninfected people were similar to those reported in  
 211 Western European studies, all without competing causes of death (eTables 1 and 2). For comparison purposes, we  
 212 preferentially chose those published data that included 95% confidence intervals.

213

214 Our model-generated cumulative lung cancer mortalities by age 75 for 20 year-old male current, former, and never  
 215 smokers were 12.5%, 1.5%, and 0.7%. The corresponding model-generated cumulative lung cancer mortalities for  
 216 female current, former, and never smokers were 10.9%, 1.0%, and 0.6%. Weighting these by the prevalence of men  
 217 and women and of current, former, and never smokers among 20 year-old PLWH in care in the US, we derived a  
 218 cumulative lung cancer mortality of 5.0% by age 75. In an NA-ACCORD study, the reported modeled cumulative  
 219 lung cancer incidence by age 75 in 2005-2009 was 3.7%.<sup>3</sup>

220

221 Our projected cumulative lung cancer mortality was slightly higher than that reported in the NA-ACCORD study.  
 222 The prevalence of current and former smokers was not reported in that study, but another NA-ACCORD study  
 223 reported lower smoking prevalence compared with the CDC data we used, which may explain the difference in  
 224 results.<sup>5,23</sup> Both our validation result and the NA-ACCORD result for 20 year-old PLWH are lower than our  
 225 population-level projection (9.3% by age 80) because the latter included people entering HIV care between ages 20  
 226 and 64; the older people had survived long enough to face higher lung cancer risks, which increase with age.

227

228 *Sensitivity Analysis*229 Incomplete Adherence to Antiretroviral Therapy and Loss to Follow-Up from HIV Care

230 Model-generated results when accounting for incomplete adherence to ART and loss to follow-up from HIV care are  
 231 in the text and Figure 2 (Panels C-D) of the main manuscript, with additional detail in eTable 5 and eFigure 2 (Panel  
 232 B) of this Supplement.

233

234 Varying the HIV-Associated Risk Ratio for Lung Cancer

235 eTable 6 shows the impact on model-projected cumulative lung cancer mortality of varying the HIV-associated  
 236 independent risk factor for lung cancer (these analyses assumed no independent risk of HIV on other non-AIDS-  
 237 related mortality). For example, our base case result, with a risk ratio of 1.7, for 40 year-old male/female current  
 238 moderate smokers was 23.0%/20.9%. The results for men varied from 14.6% to 25.2%, and for women from 13.0%  
 239 to 22.9%, when we varied the risk ratio from 1.0 to 1.9.

240

241 Varying the Initial CD4 Count at Entry to Care

242 There was little difference in the cumulative mortality from lung cancer, other non-AIDS-related causes, and AIDS-  
 243 related causes when varying the initial CD4 count (eTable 7). These analyses assumed immediate ART initiation,  
 244 complete adherence to ART, and no loss to follow-up from HIV care.

245

246 Varying When Former Smokers Quit

247 Smoking cessation 10 or 20 years after entering HIV care reduced lung cancer mortality by a lesser degree than  
 248 cessation immediately upon entering care. Among male and female smokers entering care at age 40, relative  
 249 reductions in lung cancer mortality by age 80 compared with those who continued to smoke were: for those who quit  
 250 at age 40, 72.7-77.7%; quit at age 50, 53.9-62.7%; and quit at age 60, 24.9-36.7% (eTable 8).

251

252

## 253 REFERENCES

- 254 1. Peto R, Darby S, Deo H, Silcocks P, Whitley E, Doll R. Smoking, smoking cessation, and lung cancer in the  
255 UK since 1950: combination of national statistics with two case-control studies. *BMJ*. 2000;321(7257):323-  
256 329. doi:10.1136/bmj.321.7257.323.
- 257 2. Crispo A, Brennan P, Jöckel K-H, et al. The cumulative risk of lung cancer among current, ex- and never-  
258 smokers in European men. *Br J Cancer*. 2004;91(7):1280-1286. doi:10.1038/sj.bjc.6602078.
- 259 3. Silverberg MJ, Lau B, Achenbach CJ, et al. Cumulative incidence of cancer among persons with HIV in  
260 North America: a cohort study. *Ann Intern Med*. 2015;163(7):507-518. doi:10.7326/M14-2768.
- 261 4. Centers for Disease Control and Prevention. HIV Surveillance Report, 2013; vol. 25.  
262 <http://www.cdc.gov/hiv/library/reports/surveillance/>. Accessed May 3, 2017.
- 263 5. Mdodo R, Frazier EL, Dube SR, et al. Cigarette smoking prevalence among adults with HIV compared with  
264 the general adult population in the United States: cross-sectional surveys. *Ann Intern Med*. 2015;162(5):335-  
265 344. doi:10.7326/M14-0954.
- 266 6. Rosenberg MA, Feuer EJ, Yu B, et al. Cohort life tables by smoking status removing lung cancer as a cause of  
267 death. *Risk Anal*. 2012;32(Suppl 1):S25-S38. doi:10.1111/j.1539-6924.2011.01662.x.
- 268 7. National Cancer Institute. SEER Cancer Statistics Review 1975-2000.  
269 [http://seer.cancer.gov/archive/csr/1975\\_2000/results\\_merged/sect\\_15\\_lung\\_bronchus.pdf](http://seer.cancer.gov/archive/csr/1975_2000/results_merged/sect_15_lung_bronchus.pdf). Accessed May 3,  
270 2017.
- 271 8. Pleis J, Benson V, Schiller J. Summary health statistics for U.S. Adults: National Health Interview Survey,  
272 2000. National Center for Health Statistics. *Vital Health Stat*. 2003;10(215).  
273 [https://www.cdc.gov/nchs/data/series/sr\\_10/sr10\\_215.pdf](https://www.cdc.gov/nchs/data/series/sr_10/sr10_215.pdf). Accessed May 3, 2017.
- 274 9. Thun MJ, Carter BD, Feskanich D, et al. 50-year trends in smoking-related mortality in the United States. *N*  
275 *Engl J Med*. 2013;368(4):351-364. doi:10.1056/NEJMsa1211127.
- 276 10. Hyland A, Li Q, Bauer JE, Giovino GA, Steger C, Cummings KM. Predictors of cessation in a cohort of  
277 current and former smokers followed over 13 years. *Nicotine Tob Res*. 2004;6 Suppl 3:S363-369.  
278 doi:10.1080/14622200412331320761.
- 279 11. Sigel K, Wisnivesky J, Gordon K, et al. HIV as an independent risk factor for incident lung cancer. *AIDS*.  
280 2012;26(8):1017-1025. doi:10.1097/QAD.0b013e328352d1ad.
- 281 12. Doll R, Peto R, Boreham J, Sutherland I. Mortality in relation to smoking: 50 years' observations on male  
282 British doctors. *BMJ*. 2004;328(7455):1519. doi:10.1136/bmj.38142.554479.AE.
- 283 13. Jha P, Ramasundarahettige C, Landsman V, et al. 21st-century hazards of smoking and benefits of cessation in  
284 the United States. *N Engl J Med*. 2013;368(4):341-350. doi:10.1056/NEJMsa1211128.
- 285 14. Sax PE, Meyers JL, Mugavero M, Davis KL. Adherence to antiretroviral treatment and correlation with risk  
286 of hospitalization among commercially insured HIV patients in the United States. *PloS One*.  
287 2012;7(2):e31591. doi:10.1371/journal.pone.0031591.
- 288 15. Hirsch JD, Gonzales M, Rosenquist A, Miller TA, Gilmer TP, Best BM. Antiretroviral therapy adherence,  
289 medication use, and health care costs during 3 years of a community pharmacy medication therapy  
290 management program for Medi-Cal beneficiaries with HIV/AIDS. *J Manag Care Pharm*. 2011;17(3):213-  
291 223. doi:10.18553/jmcp.2011.17.3.213.

- 292 16. Ross EL, Weinstein MC, Schackman BR, et al. The clinical role and cost-effectiveness of long-acting  
293 antiretroviral therapy. *Clin Infect Dis*. 2015;60(7):1102-1110. doi:10.1093/cid/ciu1159.
- 294 17. Messou E, Chaix M-L, Gabillard D, et al. Association between medication possession ratio, virologic failure  
295 and drug resistance in HIV-1-infected adults on antiretroviral therapy in Côte d'Ivoire. *J Acquir Immune Defic*  
296 *Syndr*. 2011;56(4):356-364. doi:10.1097/QAI.0b013e3182084b5a.
- 297 18. Fleishman JA, Yehia BR, Moore RD, Korthuis PT, Gebo KA, HIV Research Network. Establishment,  
298 retention, and loss to follow-up in outpatient HIV care. *J Acquir Immune Defic Syndr*. 2012;60(3):249-259.  
299 doi:10.1097/QAI.0b013e318258c696.
- 300 19. Helleberg M, Engsig FN, Kronborg G, et al. Retention in a public healthcare system with free access to  
301 treatment: a Danish nationwide HIV cohort study. *AIDS*. 2012;26(6):741-748.  
302 doi:10.1097/QAD.0b013e32834fa15e.
- 303 20. Althoff KN, Gange SJ, Klein MB, et al. Late presentation for human immunodeficiency virus care in the  
304 United States and Canada. *Clin Infect Dis*. 2010;50(11):1512-1520. doi:10.1086/652650.
- 305 21. Reddy KP, Parker RA, Losina E, et al. Impact of cigarette smoking and smoking cessation on life expectancy  
306 among people with HIV: a US-based modeling study. *J Infect Dis*. 2016;214(11):1672-1681.  
307 doi:10.1093/infdis/jiw430.
- 308 22. Centers for Disease Control and Prevention. CDC VitalSigns - new hope for stopping HIV. Centers for  
309 Disease Control and Prevention. <http://www.cdc.gov/vitalsigns/hivtesting/index.html>. Published November  
310 29, 2011. Accessed May 13, 2017.
- 311 23. Wong C, Gange SJ, Buchacz K, et al. First occurrence of diabetes, chronic kidney disease, and hypertension  
312 among North American HIV-infected adults, 2000-2013. *Clin Infect Dis*. 2017;64(4):459-467.  
313 doi:10.1093/cid/ciw804.

314

315

316 **eTable 1. Validation of Model-Generated Cumulative Lung Cancer Mortality by Age 75 for HIV-Uninfected**  
 317 **Current Smokers: Comparison with Case-Control Studies from Western Europe**  
 318

|                           | <b>Model-Generated<br/>Results,<br/>Men/Women, %</b> | <b>Peto et al.,<sup>1</sup> UK,<br/>Men/Women, %<br/>(95% CI)</b> | <b>Crispo et al.,<sup>2</sup><br/>UK, %<br/>(95% CI)</b> | <b>Crispo et al.,<sup>2</sup><br/>Germany, %<br/>(95% CI)</b> | <b>Crispo et al.,<sup>2</sup><br/>Italy, %<br/>(95% CI)</b> |
|---------------------------|------------------------------------------------------|-------------------------------------------------------------------|----------------------------------------------------------|---------------------------------------------------------------|-------------------------------------------------------------|
| Current smokers, heavy    | 24.5/19.5                                            | 24.4 (17.1-31.2)/<br>18.5 (9.4-26.7)                              | 23.6 (17.5-29.3)                                         | 25.7 (24.3-27.0)                                              | 20.1 (18.6-21.5)                                            |
| Current smokers, moderate | 17.9/13.6                                            | 16.7 (13.4-19.9)/<br>10.4 (7.7-13.0)                              | 16.5 (13.7-19.2)                                         | 17.4 (16.6-18.2)                                              | 15.4 (14.4-16.4)                                            |
| Current smokers, light    | 12.4/9.6                                             | 12.8 (10.2-15.4)/<br>7.7 (5.4-9.9)                                | 13.1 (11.2-16.0)                                         | 9.5 (9.0-10.1)                                                | 8.3 (7.6-9.0)                                               |

319 CI: confidence interval. Model-generated results were for 40 year-old, HIV-uninfected people in the US without competing causes of death, to match the analyses performed by Peto et  
 320 al. and Crispo et al. for people in Western Europe.<sup>1,2</sup> Model-based lung cancer risks by cigarettes per day were based on stratifications from Thun et al.; we considered heavy,  
 321 moderate, and light smokers to be those who consumed 20-39, 10-19, and <10 cigarettes per day.<sup>3</sup> The cigarettes per day stratifications in Peto et al. and Crispo et al. were slightly  
 322 different; we present their data for heavy, moderate, and light smokers based on their stratifications of 25+, 15-24, and 5-14 cigarettes per day. The data reported by Crispo et al. were  
 323 not stratified by sex.



324 **eTable 2. Validation of Model-Generated Cumulative Lung Cancer Mortality by Age 75 for HIV-Uninfected**  
 325 **Former and Never Smokers: Comparison with a Case-Control Study from Western Europe**  
 326

|                | <b>Model-Generated Results,<br/>Men/Women, %</b> | <b>Crispo et al.,<sup>2</sup><br/>UK, % (95% CI)</b> | <b>Crispo et al.,<sup>2</sup><br/>Germany, % (95% CI)</b> | <b>Crispo et al.,<sup>2</sup><br/>Italy, % (95% CI)</b> |
|----------------|--------------------------------------------------|------------------------------------------------------|-----------------------------------------------------------|---------------------------------------------------------|
| Former smokers | 3.5/2.7                                          | 2.6 (1.3-3.9)                                        | 1.8 (1.4-2.1)                                             | 3.3 (2.1-4.4)                                           |
| Never smokers  | 0.8/0.6                                          | 0.2 (0.01-0.4)                                       | 0.6 (0.4-0.7)                                             | 0.6 (0.3-0.9)                                           |

327 CI: confidence interval. Model-generated results were for 40 year-old HIV-uninfected people in the US without competing causes of death, to match the analysis performed by Crispo  
 328 et al.<sup>2</sup> Model-generated results assumed moderate ("average") smoking intensity for former smokers prior to quitting at age 40; we used the risk ratio reported by Thun et al., for those  
 329 who consumed 10-19 cigarettes per day.<sup>9</sup> The cumulative lung cancer mortality for former smokers reported by Crispo et al. were for those who quit at age 40. Their results were not  
 330 further stratified by sex or cigarettes per day.

331 **eTable 3. Cumulative Mortality by Age 80 from Various Causes for People Entering HIV Care at Age 40,**  
 332 **by Smoking Exposure, Assuming Complete Antiretroviral Therapy Adherence and No Loss to Follow-up from HIV**  
 333 **Care**  
 334

|                           | Lung Cancer,<br>Men/Women, % | Other Non-AIDS-<br>Related, Men/Women, % | AIDS-Related,<br>Men/Women, % | Ratio of Lung<br>Cancer vs AIDS-<br>Related Mortality,<br>Men/Women | Combined Ratio<br>of Lung Cancer<br>or Other Non-<br>AIDS-Related vs<br>AIDS-Related<br>Mortality,<br>Men/Women |
|---------------------------|------------------------------|------------------------------------------|-------------------------------|---------------------------------------------------------------------|-----------------------------------------------------------------------------------------------------------------|
| Current smokers, heavy    | 28.9/27.8                    | 55.4/47.1                                | 2.2/2.4                       | 13.1/11.6                                                           | 38.3/31.2                                                                                                       |
| Current smokers, moderate | 23.0/20.9                    | 56.9/45.7                                | 2.3/2.5                       | 10.0/8.4                                                            | 34.7/26.6                                                                                                       |
| Current smokers, light    | 18.8/16.6                    | 49.0/37.2                                | 2.5/2.6                       | 7.5/6.4                                                             | 27.1/20.7                                                                                                       |
| Former smokers, heavy     | 7.9/7.5                      | 46.9/32.9                                | 2.5/2.8                       | 3.2/2.7                                                             | 21.9/14.4                                                                                                       |
| Former smokers, moderate  | 6.1/5.2                      | 44.5/32.0                                | 2.7/2.8                       | 2.3/1.9                                                             | 18.7/13.3                                                                                                       |
| Former smokers, light     | 4.3/3.7                      | 43.2/31.2                                | 2.7/2.8                       | 1.6/1.3                                                             | 17.6/12.5                                                                                                       |
| Never smokers             | 1.6/1.2                      | 42.5/30.8                                | 2.7/2.8                       | 0.6/0.4                                                             | 16.3/11.4                                                                                                       |

335 These analyses assumed complete adherence to antiretroviral therapy and no loss to follow-up from HIV care. Smokers are stratified by smoking intensity, based on cigarettes per  
 336 day. Current smokers continued smoking until the end of follow-up. Former smokers quit at age 40 and remained abstinent.

337 **eTable 4. Cumulative Mortality by Age 80 from Various Causes,**  
 338 **by Age at Entry to HIV Care and Smoking Exposure**  
 339

|                                 | Lung Cancer,<br>Men/Women, % | Other Non-AIDS-<br>Related, Men/Women, % | AIDS-Related,<br>Men/Women, % |
|---------------------------------|------------------------------|------------------------------------------|-------------------------------|
| <b>Enter HIV Care at Age 30</b> |                              |                                          |                               |
| Current smokers, heavy          | 28.2/27.1                    | 56.0/47.9                                | 2.8/3.0                       |
| Current smokers, moderate       | 22.4/20.3                    | 57.5/46.6                                | 2.9/3.1                       |
| Current smokers, light          | 18.4/16.2                    | 49.7/38.3                                | 3.1/3.3                       |
| Former smokers, heavy           | 4.2/2.9                      | 44.4/32.6                                | 3.3/3.5                       |
| Former smokers, moderate        | 3.2/2.0                      | 43.8/32.4                                | 3.4/3.5                       |
| Former smokers, light           | 2.1/1.4                      | 43.6/32.2                                | 3.4/3.5                       |
| Never smokers                   | 1.5/1.2                      | 43.6/32.1                                | 3.4/3.5                       |
| <b>Enter HIV Care at Age 50</b> |                              |                                          |                               |
| Current smokers, heavy          | 30.9/28.3                    | 52.5/46.1                                | 1.6/1.8                       |
| Current smokers, moderate       | 24.0/21.0                    | 55.1/44.8                                | 1.7/1.9                       |
| Current smokers, light          | 19.4/16.8                    | 47.4/36.1                                | 1.8/2.0                       |
| Former smokers, heavy           | 13.5/11.6                    | 49.1/37.0                                | 1.8/2.0                       |
| Former smokers, moderate        | 10.6/8.2                     | 46.3/34.2                                | 1.9/2.0                       |
| Former smokers, light           | 7.7/6.0                      | 42.6/31.0                                | 2.0/2.1                       |
| Never smokers                   | 1.6/1.2                      | 41.5/30.0                                | 2.1/2.2                       |

340 These analyses assumed complete adherence to antiretroviral therapy and no loss to follow-up from HIV care. Current smokers  
 341 continued smoking until the end of follow-up. Former smokers quit at entry to HIV care and remained abstinent.  
 342  
 343

344  
345  
346  
347  
348

**eTable 5. Cumulative Mortality by Age 80 from Various Causes for People Entering HIV Care at Age 40, by Smoking Exposure, Accounting for Incomplete Antiretroviral Therapy Adherence and Loss to Follow-up from HIV Care**

|                           | Lung Cancer, Men/Women, % | Other Non-AIDS-Related, Men/Women, % | AIDS-Related, Men/Women, % | Ratio of Lung Cancer vs AIDS-Related Mortality, Men/Women | Combined Ratio of Lung Cancer or Other Non-AIDS-Related vs AIDS-Related Mortality, Men/Women |
|---------------------------|---------------------------|--------------------------------------|----------------------------|-----------------------------------------------------------|----------------------------------------------------------------------------------------------|
| Current smokers, heavy    | 22.7/21.6                 | 44.8/36.9                            | 23.0/25.5                  | 1.0/0.8                                                   | 2.9/2.3                                                                                      |
| Current smokers, moderate | 17.8/16.1                 | 45.4/35.7                            | 24.3/26.4                  | 0.7/0.6                                                   | 2.6/2.0                                                                                      |
| Current smokers, light    | 14.5/12.8                 | 38.7/29.1                            | 25.9/27.6                  | 0.6/0.5                                                   | 2.1/1.5                                                                                      |
| Former smokers, heavy     | 6.1/5.8                   | 37.3/25.6                            | 26.6/28.6                  | 0.2/0.2                                                   | 1.6/1.1                                                                                      |
| Former smokers, moderate  | 4.6/4.0                   | 35.0/24.8                            | 27.4/28.9                  | 0.2/0.1                                                   | 1.4/1.0                                                                                      |
| Former smokers, light     | 3.3/2.8                   | 33.5/24.1                            | 28.0/29.2                  | 0.1/0.1                                                   | 1.3/0.9                                                                                      |
| Never smokers             | 1.2/0.9                   | 32.8/23.6                            | 28.7/29.5                  | 0.04/0.03                                                 | 1.2/0.8                                                                                      |

349  
350

These analyses assumed that all individuals entered HIV care (i.e., entered model) at age 40 and accounted for reported rates of non-adherence to antiretroviral therapy and loss to follow-up from HIV care. Current smokers continued smoking until the end of follow-up. Former smokers quit at age 40 and remained abstinent.

351 **eTable 6. Cumulative Lung Cancer Mortality by Age 80, by Smoking Exposure:**  
 352 **Varying the HIV-Associated Independent Risk of Lung Cancer**  
 353

|                           | HIV-Associated Independent Risk Ratio for Lung Cancer |                     |                                 |                     |
|---------------------------|-------------------------------------------------------|---------------------|---------------------------------|---------------------|
|                           | 1.0<br>Men/Women, %                                   | 1.5<br>Men/Women, % | 1.7 (Base Case)<br>Men/Women, % | 1.9<br>Men/Women, % |
| Current smokers, heavy    | 18.9/17.9                                             | 26.2/25.2           | <b>28.9/27.8</b>                | 31.4/30.3           |
| Current smokers, moderate | 14.6/13.0                                             | 20.8/18.8           | <b>23.0/20.9</b>                | 25.2/22.9           |
| Current smokers, light    | 11.7/10.2                                             | 16.9/14.8           | <b>18.8/16.6</b>                | 20.7/18.4           |
| Former smokers, heavy     | 4.8/4.5                                               | 7.0/6.6             | <b>7.9/7.5</b>                  | 8.8/8.3             |
| Former smokers, moderate  | 3.6/3.1                                               | 5.4/4.6             | <b>6.1/5.2</b>                  | 6.8/5.7             |
| Former smokers, light     | 2.6/2.1                                               | 3.8/3.2             | <b>4.3/3.7</b>                  | 4.8/4.1             |
| Never smokers             | 0.9/0.7                                               | 1.5/1.2             | <b>1.6/1.2</b>                  | 1.8/1.3             |

354 These analyses assumed that all individuals entered HIV care (i.e., entered the model) at age 40 and assumed complete adherence to antiretroviral therapy and  
 355 no loss to follow-up from HIV care. Current smokers continued smoking until the end of follow-up. Former smokers quit at age 40 and remained abstinent.  
 356 Base case results are shown in bold type.

357  
358  
359  
360**eTable 7. Effect of Varying the Initial CD4 Cell Count on Model-Projected Cumulative Mortality by Age 80 from Various Causes, by Smoking Status**

| Initial CD4 Cell Count of Cohort, Mean (sd)                         | Lung Cancer, Men/Women, % | Other Non-AIDS-Related, Men/Women, % | AIDS-Related, Men/Women, % |
|---------------------------------------------------------------------|---------------------------|--------------------------------------|----------------------------|
| CD4 200/ $\mu$ L (0)                                                |                           |                                      |                            |
| Current smokers                                                     | 23.0/20.9                 | 56.9/45.7                            | 2.2/2.5                    |
| Former smokers                                                      | 6.1/5.2                   | 44.6/32.1                            | 2.6/2.7                    |
| Never smokers                                                       | 1.6/1.2                   | 42.6/30.8                            | 2.7/2.8                    |
| <b>CD4 360/<math>\mu</math>L (280/<math>\mu</math>L), Base Case</b> |                           |                                      |                            |
| <b>Current smokers</b>                                              | <b>23.0/20.9</b>          | <b>56.9/45.7</b>                     | <b>2.3/2.5</b>             |
| <b>Former smokers</b>                                               | <b>6.1/5.2</b>            | <b>44.5/32.0</b>                     | <b>2.7/2.8</b>             |
| <b>Never smokers</b>                                                | <b>1.6/1.2</b>            | <b>42.5/30.8</b>                     | <b>2.7/2.8</b>             |
| CD4 500/ $\mu$ L (0)                                                |                           |                                      |                            |
| Current smokers                                                     | 23.0/21.0                 | 57.4/46.2                            | 1.7/2.0                    |
| Former smokers                                                      | 6.2/5.2                   | 45.0/32.6                            | 2.1/2.2                    |
| Never smokers                                                       | 1.6/1.2                   | 43.2/31.3                            | 2.2/2.3                    |

361 sd: standard deviation. These analyses assumed that all individuals entered HIV care (i.e., entered the model) at age 40 and  
 362 assumed complete adherence to antiretroviral therapy and no loss to follow-up from HIV care. Current smokers continued smoking  
 363 until the end of follow-up. Former smokers quit at age 40 and remained abstinent. The intensity of smoking was moderate  
 364 ("average"). Base case results are shown in bold type.

365 **eTable 8. Model-Generated Cumulative Lung Cancer Mortality and**  
 366 **Relative Risk Reduction Based on Age at Smoking Cessation,**  
 367 **for Those Entering HIV Care at Age 40**  
 368

|                                | Men                              |                                             | Women                            |                                             |
|--------------------------------|----------------------------------|---------------------------------------------|----------------------------------|---------------------------------------------|
|                                | Cumulative Lung Cancer Mortality | Relative Risk Reduction, vs Current Smokers | Cumulative Lung Cancer Mortality | Relative Risk Reduction, vs Current Smokers |
| Current smokers, heavy         | 28.9%                            | -                                           | 27.8%                            | -                                           |
| Current smokers, moderate      | 23.0%                            | -                                           | 20.9%                            | -                                           |
| Current smokers, light         | 18.8%                            | -                                           | 16.6%                            | -                                           |
| Former smokers, quit at age 40 |                                  |                                             |                                  |                                             |
| Heavy                          | 7.9%                             | -72.7%                                      | 7.5%                             | -73.0%                                      |
| Moderate                       | 6.1%                             | -73.5%                                      | 5.2%                             | -75.1%                                      |
| Light                          | 4.3%                             | -77.1%                                      | 3.7%                             | -77.7%                                      |
| Former smokers, quit at age 50 |                                  |                                             |                                  |                                             |
| Heavy                          | 13.3%                            | -54.0%                                      | 12.0%                            | -56.8%                                      |
| Moderate                       | 10.6%                            | -53.9%                                      | 8.5%                             | -59.3%                                      |
| Light                          | 7.8%                             | -58.5%                                      | 6.2%                             | -62.7%                                      |
| Former smokers, quit at age 60 |                                  |                                             |                                  |                                             |
| Heavy                          | 21.7%                            | -24.9%                                      | 18.9%                            | -32.0%                                      |
| Moderate                       | 16.8%                            | -27.0%                                      | 13.8%                            | -34.0%                                      |
| Light                          | 13.0%                            | -30.9%                                      | 10.5%                            | -36.7%                                      |

369 Individuals in the simulation model were assumed to enter HIV care at age 40 and to remain in the model until death or age 80.  
 370 These model simulations assumed complete adherence to antiretroviral therapy and no loss to follow-up from HIV care. Current  
 371 smokers continued smoking until the end of follow-up. Those who quit smoking remained abstinent.

372 **eFigure 1. Overview of Flow Through CEPAC Monte Carlo Microsimulation Model.**

373 ART: antiretroviral therapy. This figure highlights key initial subject characteristics and events in the model. In the base case  
374 analysis, there is complete adherence to ART and no loss to follow-up from HIV care. In a sensitivity analysis, there is incomplete  
375 adherence to ART and loss to follow-up from HIV care, which ultimately increase the probability of dying from an AIDS-related  
376 disease.

377  
378

379 **eFigure 2. Cumulative Mortality by Cause among Male Never Smokers Entering**  
380 **HIV Care at Age 40.**

381 ART: antiretroviral therapy; LTFU: loss to follow-up. This is an extension of Figure 2 in the main manuscript. The panels here  
382 represent never smokers. Panel A reflects simulations of men who are completely adherent to ART and are never lost to follow-up  
383 from HIV care. Panel B reflects simulations incorporating reported rates of non-adherence to ART and loss to follow-up from HIV  
384 care. Deaths from non-AIDS-related causes besides lung cancer are depicted by the solid blue lines, deaths from lung cancer are  
385 depicted by the dashed red lines, and deaths from AIDS-related causes are depicted by the dotted black lines.



386 **eFigure 1.**

387  
388  
389  
390  
391  
392  
393  
394  
395  
396  
397  
398  
399  
400  
401  
402  
403  
404  
405  
406  
407  
408  
409  
410  
411  
412  
413  
414  
415  
416  
417  
418  
419  
420  
421  
422  
423  
424  
425  
426  
427

**Base Case Analysis**

Subject enters model at time of entry  
to HIV care and starts ART

Initial subject characteristics include:  
Sex, age, CD4 count, HIV RNA  
Smoking exposure  
Smoking status: current, former, never  
Smoking intensity: heavy, moderate, light

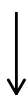

Successful ART decreases HIV RNA  
and increases CD4 over time

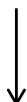

Monthly probabilities of:  
ART failure  
Dying from AIDS-related disease  
Depends on: current CD4, current HIV RNA  
Dying from lung cancer  
Depends on: sex, age, smoking exposure  
Dying from other non-AIDS related disease  
(e.g., other cancers, cardiovascular disease)  
Depends on: sex, age, smoking exposure

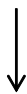

All subjects are tracked monthly until death or age 80

**Sensitivity Analysis**

Monthly probabilities of:  
Non-adherence to ART  
Loss to follow-up from care

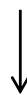

Increases HIV RNA and  
decreases CD4 over time

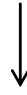

Increases monthly probability  
of dying from AIDS-related  
disease

428 **eFigure 2.**

429

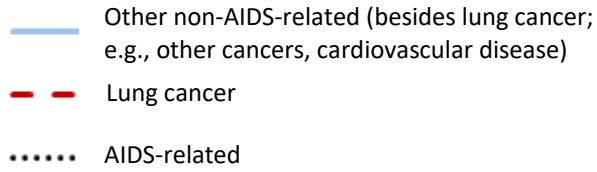

430

431

432

**Completely Adherent to ART, no LTFU**

**Incompletely Adherent to ART, with LTFU**

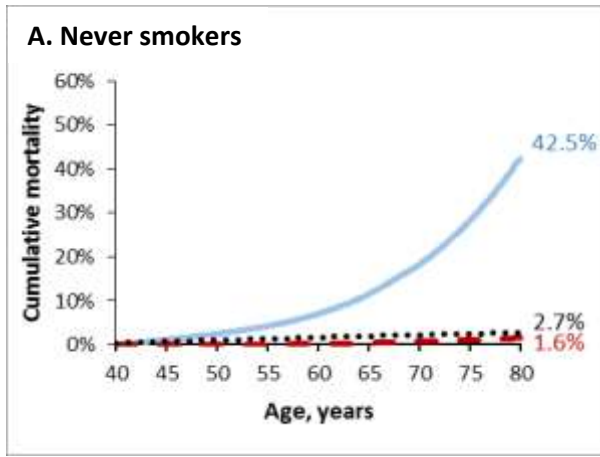

433

434

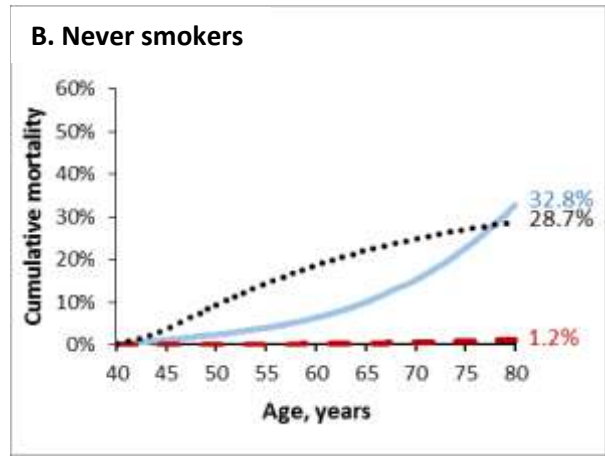

Supplement: jamainternmed-177-1613-s001.pdf [file jamainternmed-177-1613-s001.pdf]
